# Supplementary material for: Silica nanosphere-supported shaped Pd nanoparticles encapsulated with nanoporous silica shell: Efficient and recyclable nanocatalysts
Source: Royal Society of Chemistry journal article supplement (doi:10.1039/c0jm01093f), 2010-01-01
Supplement: c0jm01093f.pdf [file c0jm01093f.pdf]

**Silica Nanosphere-Supported Shaped Pd Nanoparticles Encapsulated with  
Nanoporous Silica Shell: Efficient and Recyclable Nanocatalysts**

Yanfei Wang,<sup>a,b</sup> Ankush V. Biradar,<sup>a,b</sup> Cole T. Duncan,<sup>c</sup> and Tewodros Asefa<sup>a,b,\*</sup>

<sup>a</sup> Department of Chemistry and Chemical Biology, Rutgers, The State University of New Jersey, 610 Taylor Road, Piscataway NJ 08854, USA

<sup>b</sup> Department of Chemical Engineering and Biochemical Engineering, Rutgers, The State University of New Jersey, 98 Brett Road, Piscataway, NJ 08854, USA

<sup>c</sup> Department of Chemistry, Syracuse University, CST 1-014, Syracuse, NY 13244, USA

\* Corresponding Authors: E-mail: tasefa@rci.rutgers.edu (T.A.); Tel: 1-732-445-2970; Fax: 1-732-445-5312

(I)

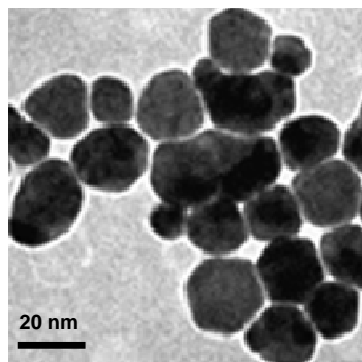

(II)

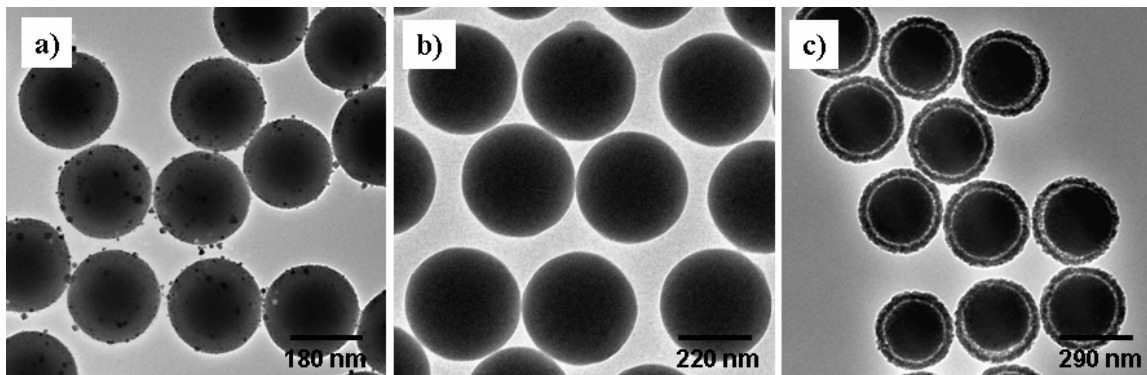

**Figure S1.** (I) TEM image of octahedral shaped Pd nanoparticles ( $\sim 20$  nm) synthesized by following the procedure reported by Lim et al. (B. Lim, Y. Xiong, Y. Xia, *Angew. Chem. Int. Ed.*, 2007, **46**, 9279). (II) Representative TEM images of (a) Pd nanoparticles (20 nm) supported on amino-modified silica nanospheres, (b)  $\text{SiO}_2/\text{Pd-NP}/\text{SiO}_2$  core-shell-shell nanospheres, and (c) etched  $\text{SiO}_2/\text{Pd-NP}/\text{Porous-SiO}_2$  core-shell-shell nanospheres.

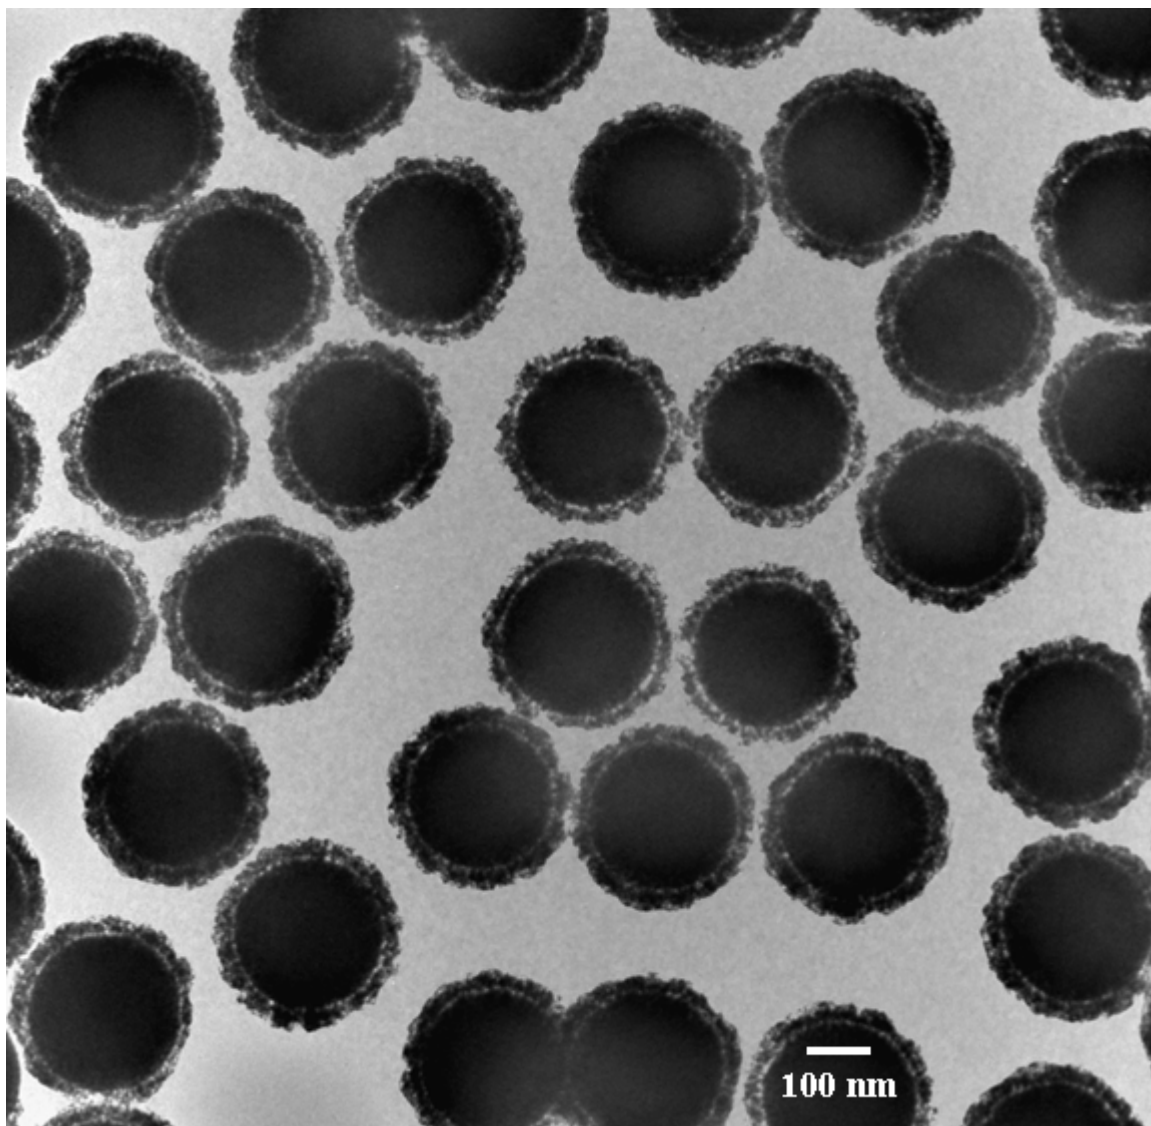

**Figure S2.** A representative TEM image of etched  $\text{SiO}_2/\text{Pd-NP}/\text{Porous SiO}_2$  core-shell-shell nanospheres (same sample as the one in Figure 1c except that this is more magnified).

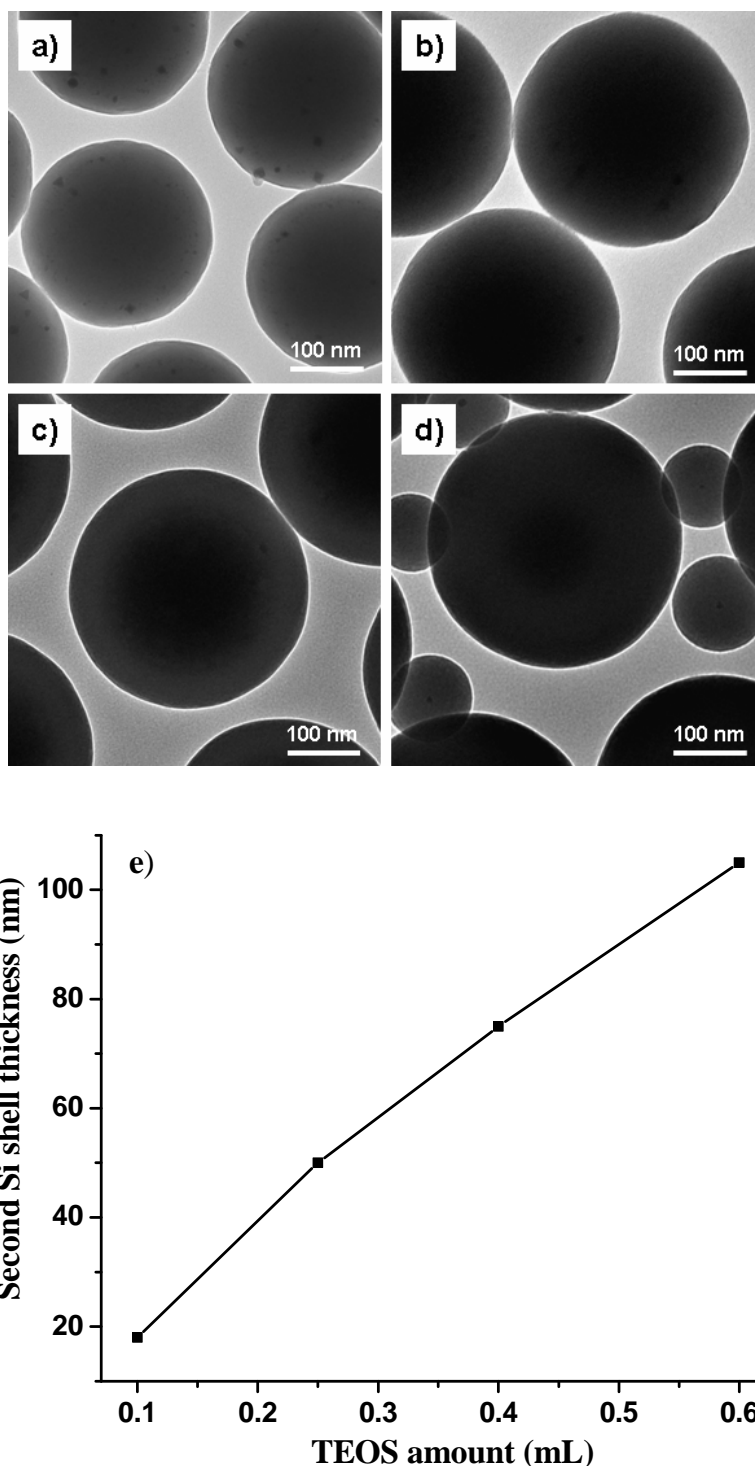

**Figure S3.** Representative TEM images of SiO<sub>2</sub>/Pd-NP/SiO<sub>2</sub> core-shell-shell nanospheres possessing different thickness of silica shell made by using different amounts of TEOS: (a) 0.1 mL TEOS, (b) 0.25 mL TEOS, (c) 0.4 mL TEOS, and (d) 0.6 mL TEOS. (e) A graph showing a linear relationship between the thickness of the silica shell and the amount of TEOS used at a given NH<sub>4</sub>OH concentration and deposition time.

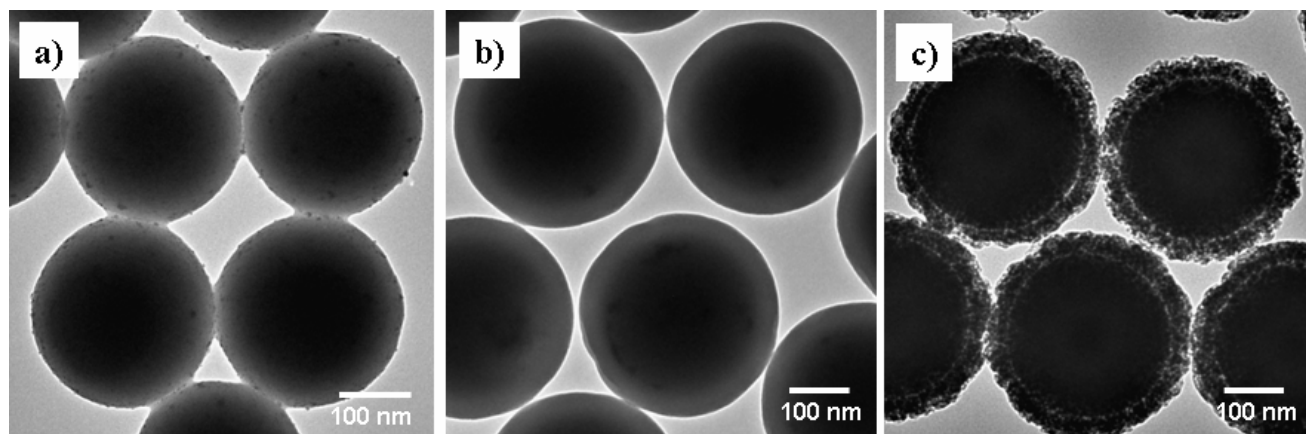

**Figure S4.** Large area TEM images of (a) Pd-NP (5 nm) supported onto amino-modified silica nanospheres, (b) SiO<sub>2</sub>/Pd-NP/SiO<sub>2</sub> core-shell-shell nanospheres, and (c) etched SiO<sub>2</sub>/PdNP/Porous SiO<sub>2</sub> core-shell-shell nanospheres etched for 80 min.

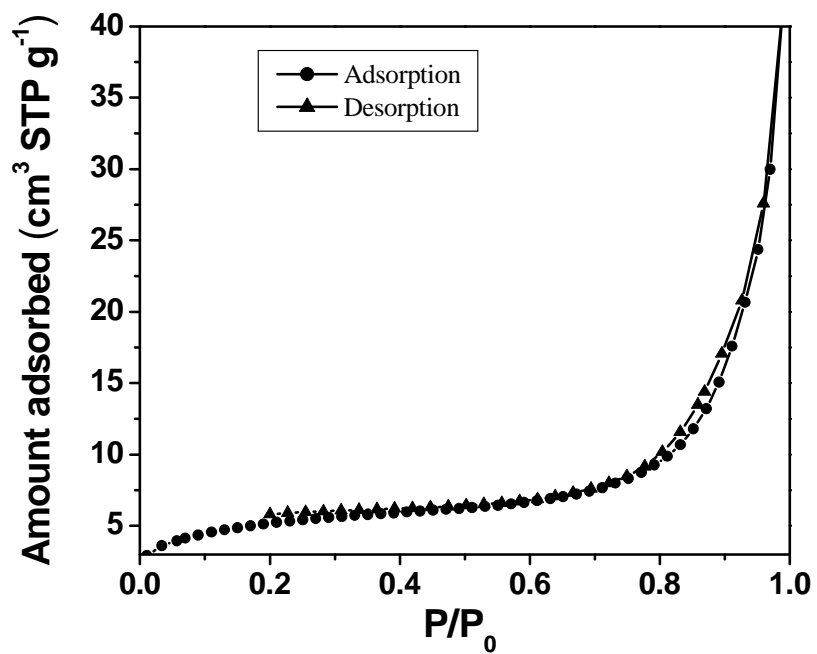

**Figure S5.** Nitrogen adsorption–desorption isotherms of SiO<sub>2</sub>/Pd-NP/Porous-SiO<sub>2</sub> nanospheres that were etched for 100 min.

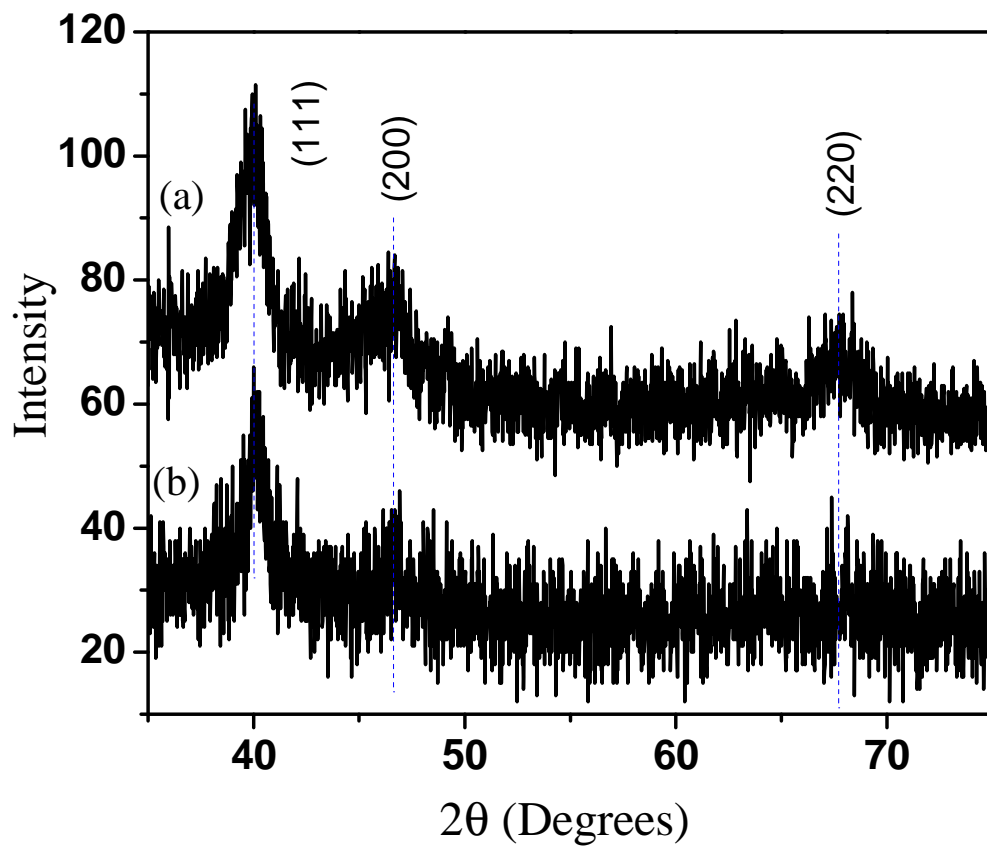

**Figure S6.** Powder XRD patterns of (a) as-prepared SiO<sub>2</sub>/Pd-NP core-shell nanospheres with 5 nm Pd-NP and (b) SiO<sub>2</sub>/Pd-NP/Porous-SiO<sub>2</sub> core-shell-shell nanospheres etched for 80 min with 5 nm Pd-NP.

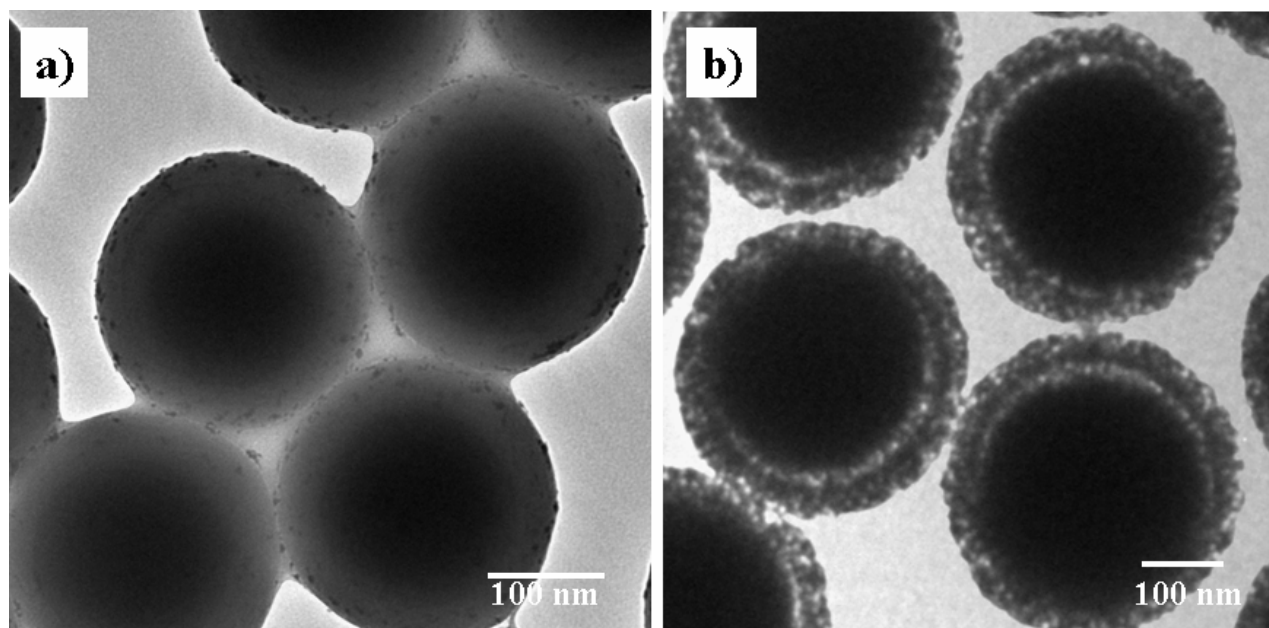

**Figure S7.** TEM images of (a)  $\text{SiO}_2/\text{Pd-NP}$  core-shell nanospheres and (b)  $\text{SiO}_2/\text{Pd-NP}/\text{Porous-SiO}_2$  nanospheres after five cycles of catalysis in hydrogenation reaction.



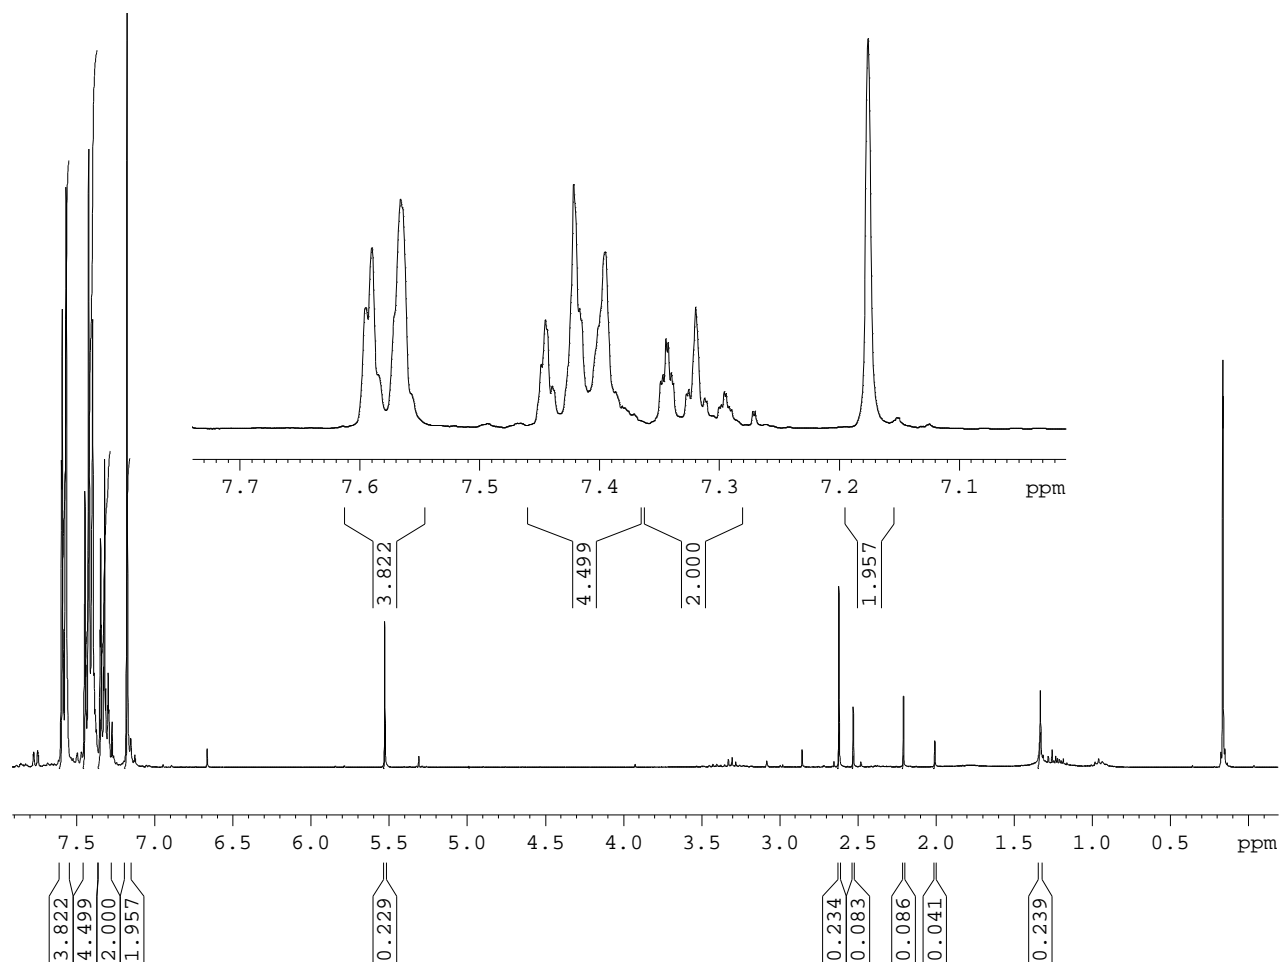

**Figure S8.**  $^1\text{H}$  NMR spectra of the Heck coupling product of trans-stilbene by using  $\text{SiO}_2/\text{Pd-NP/Porous-SiO}_2$  nanospheres as catalyst in the Heck coupling reaction between iodobenzene and styrene. The formation of trans-stilbene was monitored by GC-MS, GC and  $^1\text{H}$  NMR.  $^1\text{H}$  NMR ( $\text{CDCl}_3$ , 300 MHz):  $\delta$  7.60–7.55 (m, 4H), 7.45–7.37 (m, 4H), 7.35–7.29 (m, 2H), and 7.18 (s, 2H).
